# Supplementary material for: HLAII peptide presentation of infliximab increases when complexed with TNF
Source: Front Immunol. 2022 Sep 13;13:932252. doi: 10.3389/fimmu.2022.932252 (PMC9513746; doi:10.3389/fimmu.2022.932252)
Supplement: Supplementary file 4 [file Table_3.xlsx]

## Sheet: Supplementary_dataMAPPS_paramet
# -----------------------------------------------------------------
# Minimal dataMAPPs analysis control script
# Steiner et al., 2021 (37)
# -----------------------------------------------------------------
# Make sure that path to the config file is set correctly here.
# After the config file is sourced, all dataMAPPS functions should be ready
# for use.
# -----------------------------------------------------------------
# Project specific parameters
# -----------------------------------------------------------------
# List of projects (= subdirs) to read input from
PROJECTNAMES=c("ALL_color")
# Want to apply any normalization on the peptide signals?
# Recommended to leave this as TRUE
APPLY_NORMALIZATION = TRUE
# Do you have at least 3 samples for each donor? Then the GRSN based
# normalization is possible and the recommended option.
# Alternatively, if normalization is turned on but USE_GRSN is FALSE,
# a more traditional normalization approach is done (multiplicative
# rescaling of signals to a common median).
USE_GRSN = TRUE
# QC filtering options - samples or donors that don't meet these criteria will be excluded
# from further processing after the QC step
min_samples_per_donor = 1 # Exclude donors with fewer samples than this number
min_pep_frac_per_donor = 0.2 # Exclude donors with lower proportion of detected peptides (as compared to global median number)
min_pep_frac_per_sample = 0.2 # Exclude samples with lower proportion of detected peptides (as compared with median for that donor)
min_donor_corr = 0.50 # Exclude samples with mean signal correlation worse than this number (reference: other samples from same donor)
# Leave this set to TRUE in order to aggregate potential replications of a donor/treatment/dose condition
# in a single row for the heatMAPPs output and also to export peptide summaries on this level.
# This makes things easier for the end user as for example the default heatMAPP should look 'right', but in case
# individual replications have to be analyzed separately, the user has to provide a custom 'condition table'
# to the heatMAPPs call. While this allows very flexible plotting, it's not really documented yet.
AGGREGATE_REPLICATES = TRUE
# -----------------------------------------------------------------
# Definition of generic parameters
# -----------------------------------------------------------------
# Subdirectories for data and results - Change only if you don't want to use defaults
DATA_SUBDIR = DATA_SUBDIR_DEFAULT
RESULT_SUBDIR = RESULT_SUBDIR_DEFAULT
# Specify target antibodies to align sequences to (all corresponding peptide chains will be used)
# if NULL, all antibodies appearing in sample sheet will be used
TARGET_ANTIBODIES = NULL
# Result subdir name - Set here only if it has to be different from projectname
# RESULT_DIRNAME = ""
# -----------------------------------------------------------------------------------
# No changes should be necessary below this line to make dataMAPPS run on your data set
# -----------------------------------------------------------------------------------
# -----------------------------------------------------------------
# Loading and preparing dataset(s)
# -----------------------------------------------------------------
# Import MAPPs sample and measured data
message("Importing data...")
mapps= read_MAPPs_data(PROJECTNAMES, remove_nonunique=T, quiet=F,
pepreport_filename=file.path(RESULT_FOLDER,"PeptideQuality.xlsx"))
# -----------------------------------------------------------------
# QC (mandatory step to get valid signal matrices)
# - Flag donor and sample outliers according to passed thresholds
# - Produce PDF with bunch of diagnostic plots
# - Provide log2 signal matrix of all QC passed samples (and peptides detected at least once in this subset)
# -----------------------------------------------------------------
message("Entering QC...")
mapps = suppressWarnings( # don't bother user with non-critical warnings
MAPPs_QC(mapps,
MIN_SAMPLES_PER_DONOR = min_samples_per_donor,
MIN_DONOR_CORR = min_donor_corr,
MIN_PEP_FRAC_PER_DONOR = min_pep_frac_per_donor,
MIN_PEP_FRAC_PER_SAMPLE = min_pep_frac_per_sample,
graphics=TRUE,
quiet=F,
filename=file.path(RESULT_FOLDER,"Report01_QC_pre_normalization.pdf"))
)
# Write out a sample list that includes a few parameters from QC (like QC exclusion status and peptide counts)
write_MAPPS_samples(mapps,filename=file.path(RESULT_FOLDER, "SampleList.xlsx"))
# -----------------------------------------------------------------
# Peptide signal normalization (optional, but recommended step)
# -----------------------------------------------------------------
sig_matrix = "Sig_QCPassed" # Default if no normalization is done
if (APPLY_NORMALIZATION) {
if (USE_GRSN) {
# -----------------------------------------------------------------
# Iterative GRSN normalization, using endogenous peptide background
# Default parameters are working well with most datasets that we've encountered
# -----------------------------------------------------------------
message("Performing 2-step GRSN normalization...")
grsn_data = suppressWarnings( # don't bother user with non-critical warnings
GRSN_mapps_2step(mapps,matrix=sig_matrix,
pep_overlap_1 = 0.75,
pep_overlap_2 = 0.5,
reduce2fract = 0.8,
lowess_f_1 = 1/3,
lowess_f_2 = 2/3,
graphics=T,
filename = file.path(RESULT_FOLDER,"Report02_GRSN.pdf"),
quiet = FALSE)
)
mapps$Sig_grsn = grsn_data$grsn_matrix
sig_matrix = "Sig_grsn"
# Visualize effect of normalization - Density plots
plot_signalDensity( mapps, matrices=c("Sig_QCPassed","Sig_grsn"),
labels=c("Non-normalized","GRSN normalization"),
filename=file.path(RESULT_FOLDER, "Report03_SignalDensities.pdf"))
} else {
# -----------------------------------------------------------------
# Normalization method based on Additive Correction (on log scale)
# -----------------------------------------------------------------
message("Performing MSA (median shift averaging) normalization...")
mapps$Sig_MSA = MeanShift_Norm_MAPPS(mapps, matrix=sig_matrix)
sig_matrix = "Sig_MSA"
# Visualize effect of normalization - Density plots
plot_signalDensity( mapps, matrices=c("Sig_QCPassed","Sig_MSA"),
labels=c("Non-normalized","MSA normalization"),
filename=file.path(RESULT_FOLDER, "Report03_SignalDensities.pdf"))
}
}
# Aggregate replications for one condition, i.e. a combination of donor and treatment (dose)
# Often, there are no technical replications, in which case this call just produces a sample
# clustering which can be also interesting to look at.
message("Aggregating conditions (samples with same donor/treatment/dose)...")
sig_matrix_agg = paste(sig_matrix,"aggregated",sep="Sig_grsn")
mapps[[sig_matrix_agg]] = MAPPs_averageConditions(mapps, matrix=sig_matrix, graphics=TRUE,
filename=file.path(RESULT_FOLDER,"Report04_post_normalization.pdf"))
# Write out all MAPPs peptide signals for potential evaluation in other programs
message("Exporting peptide info for ALL peptides...")
write_MAPPS_data(mapps,matrix="Sig_grsn",
filename=file.path(RESULT_FOLDER, "mapps_data_allpeps.xlsx"),
includeAntibodyPeptides = TRUE,
includeKLHPeptides = TRUE,
includeEndoPeptides = TRUE,
includeOtherPeptides = TRUE)
message("Exporting peptide info for antibodies only...")
write_MAPPS_data(mapps,matrix="Sig_grsn",
filename=file.path(RESULT_FOLDER, "mapps_data_antibodypeps.xlsx"),
includeAntibodyPeptides = TRUE,
includeKLHPeptides = FALSE,
includeEndoPeptides = FALSE,
includeOtherPeptides = FALSE)
# -----------------------------------------------------------------
# Generate heatMAPPs plots
# -----------------------------------------------------------------
# Map peptides to target (antibody) sequences
# Sum up scores and identify peptide clusters
message("Mapping peptides and clustering epitopes...")
heatmap_result = mapps_makeHeatmap(mapps,matrix="Sig_grsn",
cluster_plot_filename=file.path(RESULT_FOLDER,"Report05_Donor_clustering.pdf"),
epitope_report_filename = file.path(RESULT_FOLDER, "Epitopes.xlsx"),
target_antibodies = TARGET_ANTIBODIES, quiet=F)
# Generate default heatMAPPs layout with one row per donor/treatment (=condition)
# This may have to be refined in specific situations, passing a user defined condition table
# as additional input to this function.
message("Producing heatMAPP plots on summary score level...")
suppressWarnings( # don't bother user with non-critical warnings
plot_heatMAPPs(heatmap_result)
)
# Set up condition table for fully expanded plots (default is one line per donor!)
conditions = unique(heatmap_result$ProteinMaps$Condition)
expand = conditions %>%
map(str_split, pattern="_", simplify = T)
# Sort by Donor, Day and Replicate
cond_sort_order = order(map_chr(expand, 3))
expand = expand[cond_sort_order]
cond_table = tibble(
Condition = conditions[cond_sort_order],
Expand = paste( map_chr(expand, 3))
)
plot_heatMAPPs( heatmap_result , CondTable = cond_table, CondLabel="Donor")
# Generate individual peptide maps
message("Producing heatMAPP plots on individual peptide level..")
suppressWarnings( # don't bother user with non-critical warnings
plot_peptideMAPPs(heatmap_result)
)
# Create a folder for plots and store the first one there
PLOT_FOLDER = file.path(RESULT_FOLDER,"Plots")
dir.create(PLOT_FOLDER)
# ------------------------------------------------------------------------------------------------
# For publication, make a nicer signal density plot
library(reshape2)
sig = rbind( data.frame(Proc="Non-normalized",melt(mapps$Sig_QCPassed)),
data.frame(Proc="GRSN",melt(mapps$Sig_grsn)))
sig$Donor = factor(mapps$Samples[as.character(sig$Var1),"Donor"])
sig$Day = factor(paste("Day",mapps$Samples[as.character(sig$Var1),"MS batch"]))
ggplot(subset(sig,value>0), aes(x=value, group=Var1,color=Donor)) +
facet_grid( Day ~ Proc) +
xlim(5, 30) + xlab(expression(log[2]~signal)) + ylab("probability density") + theme_bw() +
stat_density(geom="line",position="identity",size=0.5)
ggsave(file.path(PLOT_FOLDER,"SignalDensities.png"), dpi=300, width=8, height=5, units="cm" , scale=2)
# ------------------------------------------------------------------------------------------------
#------------------------
#Analysis of Variability
#------------------------
inputMatrix = function(matrix=NULL, processing=NULL) {
min_samp_anno = mapps$Samples[,c("Sample name","Donor","MS batch")]
min_pep_anno = unique(mapps$Peptides[,c("Peptide","Labeled","Type","Protein")])
datmat = as.data.frame(mapps[[matrix]])
datmat$`Sample name` = rownames(datmat)
datmat$Processing=processing
tmp=merge(min_samp_anno,datmat,by="Sample name",all=FALSE)
tmp2=melt(tmp,id.vars=c("Sample name","Donor","MS batch","Processing"),variable.name="Peptide",value.name="Signal",factorsAsStrings=T)
tmp2=subset(tmp2,Signal>0)
tmp3=merge(tmp2,min_pep_anno,by="Peptide")
tmp3$Type[tmp3$Type=="Label"] = "Spiked"
tmp3$linSignal=2^tmp3$Signal -1
tmp3$SampleName = tmp3$`Sample name`
tmp3$MSBatch = tmp3$`MS batch`
tmp3
}
inputmat = rbind( inputMatrix(matrix="Sig_grsn", processing="GRSN"),
inputMatrix(matrix="Sig_QCPassed", processing="Non-normalized"))
# Create condensed and peptide-level summaries of CV values
stat_results = inputmat %>%
group_by(Peptide, Donor,`MS batch`,Processing,Type) %>%
dplyr::summarize(n=n(), mu=mean(Signal), sd=sd(Signal),
mu_lin=mean(linSignal), sd_lin=sd(linSignal),
CV=100*sd_lin/mu_lin, .groups="drop") %>%
filter(!is.na(sd))
write.xlsx(stat_results, file = file.path(RESULT_FOLDER, "stat_results.xlsx"))
# Plot CVs
stat_results$Type=factor(stat_results$Type,levels=c("Endogenous","Antibody","Unknown"))
levels(stat_results$Type) = list( "Endogenous peptides"="Endogenous", "Antibody derived peptides" = "Antibody", "Unknown" ="Unknown")
stat_results$Processing=factor(stat_results$Processing,levels=c( "Non-normalized","GSRN" ))
proc_cols = c( "GSRN"="blue","Non-normalized"="red" )
q90 <- function(x) {quantile(x,probs=0.9)}
ann_text = stat_results %>%
group_by(Processing,Type) %>%
dplyr::summarize(CV_value=median(CV), p90=q90(CV), label=paste("Median:",round(CV_value,2),"\nP90:",
round(p90,2)), CV=165, .groups="drop")
# full plot
ggplot(stat_results,aes(x=Processing, y=CV,fill=Processing)) +
facet_wrap( ~ Type, ncol=2) +
geom_boxplot(outlier.shape=NA,alpha=0.7) +
stat_summary(fun = q90, ymin=-10, ymax=-10, size= 0.3, geom = "crossbar", linetype = "dotted") +
theme(axis.text.x = element_text(angle = 90, hjust = 1)) +
theme(legend.position="none") +
geom_jitter(position=position_jitter(width=.2, height=0),aes(alpha=Type)) +
scale_alpha_manual(values=c(0.003,0.04,0.03,0.1)) +
scale_fill_manual(values=proc_cols) +
labs(title="CV as a function of peptide type and normalization method", y="CV [%]") +
theme(legend.position="none") +
geom_text(data = ann_text,aes(label =label),size=7)
ggsave(file.path(PLOT_FOLDER,"Coef_of_Variance_all.png"), dpi=600, width=8, height=8, units="cm" , scale=4)
# -----------------------------------------------------------------
# Save all R objects for potential later analysis
# -----------------------------------------------------------------
message("Saving R objects...")
save (mapps, heatmap_result, file=file.path(RESULT_FOLDER,"datamapps_results.RData"))
message("Workflow completed!")
